# Supplementary material for: Medicinal Cannabis for Paediatric Developmental, Behavioural and Mental Health Disorders
Source: MDPI journal article supplement (doi:10.3390/ijerph20085430), 2023-04-07
Supplement: s1 [file s1]

Supplementary Table S1: Registered trials of medicinal cannabis in autism spectrum disorder

| Registry Number     | Location  | Design                                                     | Population                                                   | Product                                                                                                                                        | Outcomes                                                                                                                                                                                                                                                                                        |
|---------------------|-----------|------------------------------------------------------------|--------------------------------------------------------------|------------------------------------------------------------------------------------------------------------------------------------------------|-------------------------------------------------------------------------------------------------------------------------------------------------------------------------------------------------------------------------------------------------------------------------------------------------|
| ACTRN12622000437763 | Australia | Double-blind, randomised crossover trial of CBD vs placebo | 34 participants with ASD, Age 5-12 years, IQ >40             | 10 mg/kg/day of cannabidiol (Medigrowth CBD100 100mg/ml CBD, <1mg/ml THC) for 12 weeks                                                         | Primary outcome: Social Responsiveness Scale<br><br>Secondary outcome: EEG during social task; behavioural and QOL questionnaires.                                                                                                                                                              |
| ACTRN12621000760875 | Australia | Prospective open label                                     | 20 participants with ASD aged 8 to 17                        | “NTI164” Full-spectrum medicinal cannabis plant extract with 0.08% THC - Children will receive the maximum tolerated dose daily or 20mg/kg/day | Primary outcome: Clinical Global Impression Scale – Improvement (CGI-I); adaptive behaviour functioning; safety (assessed by full blood examination).<br><br>Secondary outcome: behavioural, mental health and QOL questionnaires; safety as assessed by liver and kidney function blood tests. |
| ACTRN12621000370808 | Australia | Open label, observational study                            | 150 participants with ASD aged 6 and older (includes adults) | Zelira Hope products: Hope 1 (CBD:THC 1:1) and Hope 2 (CBD:THC                                                                                 | Behaviour difficulties, clinician and caregiver                                                                                                                                                                                                                                                 |

|             |           |                                                                                                                   |                                              |                                                                                                                 |                                                                                                                                                                      |
|-------------|-----------|-------------------------------------------------------------------------------------------------------------------|----------------------------------------------|-----------------------------------------------------------------------------------------------------------------|----------------------------------------------------------------------------------------------------------------------------------------------------------------------|
|             |           |                                                                                                                   |                                              | 1:5), dose as clinically indicated based on effectiveness and tolerability                                      | rating of change, sleep, parenting stress.                                                                                                                           |
| NCT05626959 | Australia | Double-Blind, Randomised and Controlled-to-Open-Label Study                                                       | 54 participants with ASD, aged 8 to 17 years | “NTI164” Full-Spectrum Medicinal Cannabis Plant Extract with less than 0.08% THC, with dosage up to 20mg/kg/day | Primary outcome: change as rated on the CGI.<br><br>Secondary outcomes: adaptive function, social responsiveness, mental health symptoms, sleep.                     |
| NCT04517799 | USA       | Double-Blind, Crossover Trial                                                                                     | 42 males with ASD aged 7-14 years old        | Epidiolex (CBD isolate) 20mg/kg/day – 8 week intervention periods                                               | Primary outcome: repetitive behaviour, problem behaviour and ASD symptoms.<br><br>Secondary: aberrant behaviour, self-harm, social responsiveness, vocabulary, sleep |
| NCT04520685 | USA       | Randomized, placebo-controlled study.<br><br>Group A will receive cannabidiol for the first 12 weeks of the study | 70 participants with ASD aged 5-17 years old | Cannabidiol 100mg/ml, target dose 10mg/kg/day.                                                                  | Primary outcome: irritability.<br><br>Secondary: behaviour problems, anxiety, depression, mood,                                                                      |

|             |                                    |                                                                                                                                                                                                                                             |                                                                         |                                                                    |                                                                                                                                                                                    |
|-------------|------------------------------------|---------------------------------------------------------------------------------------------------------------------------------------------------------------------------------------------------------------------------------------------|-------------------------------------------------------------------------|--------------------------------------------------------------------|------------------------------------------------------------------------------------------------------------------------------------------------------------------------------------|
|             |                                    | <p>and placebo for the last 15 weeks.</p> <p>Group B will receive placebo for the first 15 weeks of the study and cannabidiol for the last 12 weeks</p> <p>Group C will receive cannabidiol throughout the entire 27 weeks of treatment</p> |                                                                         |                                                                    | social responsiveness, behaviour, sleep, QOL                                                                                                                                       |
| NCT04745026 | International – UK, USA, Australia | Randomized, Double-blind, Placebo-controlled Trial                                                                                                                                                                                          | 160 participants with ASD and IQ > 70, aged 6-17 years                  | GW Epidiolex 10mg/kg/day                                           | Primary: Behaviour problems, adaptive function, CGI                                                                                                                                |
| NCT03900923 | USA                                | Open, Bayesian optimal interval (BOIN) design: participants were assigned to cohorts of size 3 receiving doses of 3, 6, or 9 mg/kg/day, depending on the treatment response of participants in prior cohorts                                | 30 participants with ASD between the ages of 7 and 17 years old, IQ >80 | GW Epidiolex                                                       | <p>Primary: CGI</p> <p>Secondary: range of outcomes including repetitive behaviour, social responsiveness, behaviour, anxiety, depression, mood, sleep, anxiety, adhd symptoms</p> |
| NCT05212493 | Israel                             | Open label, randomized, two active comparison arms                                                                                                                                                                                          | 128 participants aged 5 to 25, diagnosed with ASD by DSM                | Two cannabidiol-rich (CBD:THC ratio of 20:1) cannabis oil products | Primary: Attention, cognition, communication skills, adaptive behaviour,                                                                                                           |

|             |     |                                                                     |                                                                                                                       |                              |                                                                                                                                                              |
|-------------|-----|---------------------------------------------------------------------|-----------------------------------------------------------------------------------------------------------------------|------------------------------|--------------------------------------------------------------------------------------------------------------------------------------------------------------|
|             |     |                                                                     | IQ below 70. The investigator can include patients with IQ above 70 if they have significant ASD or comorbid symptoms | from different manufacturers | violent behaviour, cannabinoid metabolites in participant blood.<br><br>Secondary: side effects, sleep, eating, hormonal profile and biochemical parameters. |
| NCT03202303 | USA | Phase 2, 12-week double-blind, randomized, placebo-controlled trial | 100 participants with ASD aged 5 to 18 years old                                                                      | 10 mg/kg/day of CBDV         | Primary: irritable behaviour; Secondary: Behaviour, QOL, CGI                                                                                                 |
